# Supplementary material
Source: publisher figshare collection journal article supplement (https://gsapubs.figshare.com/ndownloader/files/22756769)
Supplement: Supplementary file 1 [file 22756769]

Data repository 2009023 for:

Geologic and Taphonomic Context of El Bosque Petrificado Piedra Chamana (Cajamarca, Peru)

We dated three feldspar separates from two samples from El Bosque Petrificado Piedra Chamana using  $^{40}\text{Ar}/^{39}\text{Ar}$  methods. Single crystal laser-fusion analyses were performed at the New Mexico Geochronology Laboratory using a MAP 215-50 mass spectrometer on line with an all-metal automated  $\text{CO}_2$  laser extraction line. Results are summarized in Table 1 and detailed in Table 2 and Figure 1. Table 2 footnotes include details of the instrumentation and analytical parameters.

Sanidine from sample SX-050, a welded ignimbrite underlying the fossiliferous deposit, provided the highest quality age determination. Twenty-eight single crystals yielded ages ranging from  $38.76 \pm 0.09$  Ma to  $39.89 \pm 0.08$  Ma. A probability plot of these data (Fig. 1a, Table 2) suggests a unimodal Gaussian distribution, although the scatter in the data ( $\text{MSWD} = 10.9$ ) is somewhat higher than would be expected from analytical uncertainty alone. Excluding results from the youngest crystal, the weighted mean age of twenty-seven crystals is  $39.52 \pm 0.11$  Ma (2 sigma error). We interpret this as an accurate determination of the eruption age of the ignimbrite.

Plagioclase grains from SX-050 and SX-010 were too small for precise single-crystal analyses. Aliquots of 10 to 30 crystals were analyzed by two-step laser-incremental heating. The initial laser-heating step for each analysis was used to remove atmospheric argon. Data from these initial steps have very low precision and are not included in Table 2 or Figure 1.

The four aliquots of crystals plagioclase from the SX-050 yielded a weighted mean age of  $39.17 \pm 0.21$  Ma (Fig. 2b, Table 2), which is analytically indistinguishable from the sanidine result described above.

Dating of plagioclase from sample SX-010 of the fossil-bearing ash-fall deposit was complicated by pervasive clay-alteration of the crystals. No sanidine was found in this unit. Data from five aliquots of plagioclase crystals produced reasonably precise ages (Table 2), which are bimodally distributed (Fig. 2c, Table 2). The ages of three aliquots overlap and yield a weighted mean age of  $39.35 \pm 0.21$  Ma, which we interpret as the eruption age of this unit. The apparent ages of the other two aliquots are younger, near 38.2 Ma. We interpret these anomalously young ages as being due to alteration. Analysis of additional crystals might facilitate more confident interpretation of this apparent bimodal age distribution.

Table 1. Summary of  $^{40}\text{Ar}/^{39}\text{Ar}$  results from Sexi, Peru samples.

| Sample | Unit                     | Location             | L#    | Irrad   | min         | Mean Age |    |      |                 |                  |  |  |
|--------|--------------------------|----------------------|-------|---------|-------------|----------|----|------|-----------------|------------------|--|--|
|        |                          |                      |       |         |             | analysis | n  | MSWD | K/Ca $\pm$ 2s   | Age(Ma) $\pm$ 2s |  |  |
| SX-050 | welded ignimbrite        | S6 31.834 W79 02.874 | 56307 | NM-196M | Sanidine    | Mean     | 27 | 10.9 | 58.7 $\pm$ 45.1 | 39.52 $\pm$ 0.11 |  |  |
| SX-050 | welded ignimbrite        | S6 31.834 W79 02.874 | 56311 | NM-196N | Plagioclase | Mean     | 4  | 2.6  | 0.6 $\pm$ 0.1   | 39.17 $\pm$ 0.21 |  |  |
| SX-010 | white ash above paleosol | S6 34.188 W79 02.048 | 56310 | NM-196N | Plagioclase | Mean     | 3  | 0.4  | 0.2 $\pm$ 0.0   | 39.35 $\pm$ 0.21 |  |  |

**Table 2.  $^{40}\text{Ar}/^{39}\text{Ar}$  analytical data.**

| ID                                                                         | $^{40}\text{Ar}/^{39}\text{Ar}$ | $^{37}\text{Ar}/^{39}\text{Ar}$ | $^{36}\text{Ar}/^{39}\text{Ar}$<br>( $\times 10^{-3}$ ) | $^{39}\text{Ar}_K$<br>( $\times 10^{-15}$ mol) | K/Ca       | $^{40}\text{Ar}^*$<br>(%) | Age<br>(Ma) | $\pm 1\sigma$<br>(Ma) |
|----------------------------------------------------------------------------|---------------------------------|---------------------------------|---------------------------------------------------------|------------------------------------------------|------------|---------------------------|-------------|-----------------------|
| SX-050, Sanidine, J=0.0009108±0.05%, D=1.002±0.001, NM-196M, Lab#=56307    |                                 |                                 |                                                         |                                                |            |                           |             |                       |
| x 06                                                                       | 24.25                           | 0.0179                          | 1.385                                                   | 4.412                                          | 28.6       | 98.3                      | 38.764      | 0.089                 |
| 01                                                                         | 24.27                           | 0.0057                          | 0.9105                                                  | 5.727                                          | 89.2       | 98.9                      | 39.005      | 0.075                 |
| 04                                                                         | 24.26                           | 0.0092                          | 0.8310                                                  | 3.307                                          | 55.7       | 99.0                      | 39.032      | 0.088                 |
| 27                                                                         | 24.18                           | 0.0275                          | 0.2959                                                  | 6.365                                          | 18.6       | 99.6                      | 39.162      | 0.068                 |
| 10                                                                         | 24.29                           | 0.0136                          | 0.5668                                                  | 5.422                                          | 37.6       | 99.3                      | 39.208      | 0.067                 |
| 13                                                                         | 24.31                           | 0.0057                          | 0.5477                                                  | 2.217                                          | 89.7       | 99.3                      | 39.24       | 0.10                  |
| 20                                                                         | 24.27                           | 0.0324                          | 0.3378                                                  | 5.182                                          | 15.7       | 99.6                      | 39.287      | 0.084                 |
| 16                                                                         | 24.34                           | 0.0113                          | 0.5595                                                  | 3.550                                          | 45.2       | 99.3                      | 39.295      | 0.089                 |
| 11                                                                         | 24.41                           | 0.0055                          | 0.6774                                                  | 5.954                                          | 92.0       | 99.2                      | 39.348      | 0.073                 |
| 17                                                                         | 24.33                           | 0.0067                          | 0.3533                                                  | 3.987                                          | 75.9       | 99.6                      | 39.378      | 0.088                 |
| 24                                                                         | 24.38                           | 0.0067                          | 0.4547                                                  | 2.258                                          | 76.4       | 99.5                      | 39.41       | 0.11                  |
| 15                                                                         | 24.51                           | 0.0122                          | 0.7904                                                  | 7.942                                          | 41.7       | 99.1                      | 39.454      | 0.068                 |
| 23                                                                         | 24.44                           | 0.0129                          | 0.5545                                                  | 8.156                                          | 39.4       | 99.3                      | 39.464      | 0.067                 |
| 09                                                                         | 25.02                           | 0.0065                          | 2.327                                                   | 4.099                                          | 78.9       | 97.3                      | 39.546      | 0.080                 |
| 12                                                                         | 24.47                           | 0.0085                          | 0.4781                                                  | 5.912                                          | 59.9       | 99.4                      | 39.547      | 0.068                 |
| 07                                                                         | 24.55                           | 0.0076                          | 0.7070                                                  | 5.442                                          | 66.8       | 99.2                      | 39.561      | 0.083                 |
| 05                                                                         | 24.53                           | 0.0065                          | 0.5101                                                  | 2.150                                          | 78.5       | 99.4                      | 39.61       | 0.12                  |
| 08                                                                         | 24.47                           | 0.0410                          | 0.2647                                                  | 7.354                                          | 12.5       | 99.7                      | 39.649      | 0.066                 |
| 18                                                                         | 24.46                           | 0.0106                          | 0.2003                                                  | 4.565                                          | 47.9       | 99.8                      | 39.651      | 0.078                 |
| 19                                                                         | 24.49                           | 0.0082                          | 0.2360                                                  | 4.082                                          | 62.2       | 99.7                      | 39.681      | 0.080                 |
| 21                                                                         | 24.47                           | 0.0175                          | 0.1149                                                  | 4.750                                          | 29.2       | 99.9                      | 39.721      | 0.088                 |
| 14                                                                         | 24.48                           | 0.0089                          | 0.1404                                                  | 3.762                                          | 57.2       | 99.8                      | 39.721      | 0.073                 |
| 02                                                                         | 24.50                           | 0.0073                          | 0.1738                                                  | 2.279                                          | 69.7       | 99.8                      | 39.74       | 0.10                  |
| 28                                                                         | 24.58                           | 0.0067                          | 0.3795                                                  | 7.319                                          | 75.9       | 99.5                      | 39.766      | 0.069                 |
| 26                                                                         | 24.57                           | 0.0068                          | 0.2138                                                  | 6.876                                          | 74.7       | 99.7                      | 39.830      | 0.062                 |
| 25                                                                         | 24.63                           | 0.0086                          | 0.3939                                                  | 4.980                                          | 59.6       | 99.5                      | 39.841      | 0.079                 |
| 03                                                                         | 24.65                           | 0.0072                          | 0.3857                                                  | 5.031                                          | 71.0       | 99.5                      | 39.870      | 0.077                 |
| 22                                                                         | 24.95                           | 0.0079                          | 1.372                                                   | 3.369                                          | 64.8       | 98.4                      | 39.889      | 0.081                 |
| Mean age ± 2σ                                                              |                                 | n=27                            | MSWD=10.92                                              |                                                | 58.7 ±45.1 |                           | 39.52       | 0.11                  |
| SX-050, Plagioclase, J=0.000918±0.11%, D=1.002±0.001, NM-196N, Lab#=56311  |                                 |                                 |                                                         |                                                |            |                           |             |                       |
| 03B                                                                        | 24.92                           | 1.035                           | 4.311                                                   | 1.834                                          | 0.49       | 95.2                      | 38.90       | 0.13                  |
| 04B                                                                        | 24.52                           | 0.9491                          | 2.353                                                   | 2.180                                          | 0.54       | 97.5                      | 39.19       | 0.11                  |
| 02B                                                                        | 24.43                           | 0.9718                          | 1.988                                                   | 2.753                                          | 0.52       | 97.9                      | 39.209      | 0.099                 |
| 05B                                                                        | 24.98                           | 0.7859                          | 3.333                                                   | 1.468                                          | 0.65       | 96.3                      | 39.43       | 0.15                  |
| x 01B                                                                      | 25.77                           | 1.047                           | 4.931                                                   | 2.610                                          | 0.49       | 94.7                      | 39.99       | 0.11                  |
| Mean age ± 2σ                                                              |                                 | n=4                             | MSWD=2.58                                               |                                                | 0.55 ±0.14 |                           | 39.17       | 0.21                  |
| SX-010, Plagioclase, J=0.0009167±0.11%, D=1.002±0.001, NM-196N, Lab#=56310 |                                 |                                 |                                                         |                                                |            |                           |             |                       |
| x 03B                                                                      | 23.63                           | 2.764                           | 2.035                                                   | 2.123                                          | 0.18       | 98.4                      | 38.12       | 0.12                  |
| x 01B                                                                      | 25.79                           | 3.059                           | 9.047                                                   | 1.935                                          | 0.17       | 90.6                      | 38.31       | 0.15                  |
| 02B                                                                        | 24.20                           | 2.763                           | 1.512                                                   | 1.668                                          | 0.18       | 99.1                      | 39.29       | 0.14                  |
| 05B                                                                        | 24.28                           | 3.318                           | 1.900                                                   | 1.275                                          | 0.15       | 98.8                      | 39.34       | 0.18                  |
| 04B                                                                        | 24.76                           | 3.152                           | 3.093                                                   | 0.841                                          | 0.16       | 97.4                      | 39.52       | 0.21                  |
| Mean age ± 2σ                                                              |                                 | n=3                             | MSWD=0.38                                               |                                                | 0.17 ±0.03 |                           | 39.35       | 0.21                  |

---

**Notes:****Age calculations:**

x symbol preceding sample ID denotes analyses excluded from mean age calculations.  
Ages calculated relative to FC-2 Fish Canyon Tuff sanidine interlaboratory standard (28.02 Ma, Renne et al, 1998).  
Isotopic ratios corrected for blank, radioactive decay, and mass discrimination, not corrected for interfering reactions.  
Errors quoted for individual analyses include analytical error only, without interfering reaction or J uncertainties.  
Mean age is weighted mean age of Taylor (1982). Mean age error is weighted error of the mean (Taylor, 1982), multiplied by the root of the MSWD where MSWD>1, and also incorporates uncertainty in J factors and irradiation correction uncertainties.  
Decay constants and isotopic abundances after Steiger and Jäger (1977).  
All weighted-mean age errors reported at  $\pm 2\sigma$ .

**Sample preparation and irradiation:**

Feldspar separates prepared using crushing, dilute HCl acid treatment, Franz magnetic separator, and hand-picking techniques.  
Samples were loaded into machined Al discs and irradiated in one batch (NM-196) for 9 hours in the D-3 position, Nuclear Science Center, College Station, TX.  
Neutron flux monitor Fish Canyon Tuff sanidine (FC-1).

**Instrumentation:**

Mass Analyzer Products 215-50 mass spectrometer on line with automated all-metal extraction system.  
Samples were fused or heated in two steps using a Synrad 50 watt CO<sub>2</sub> laser (heating duration 30 seconds).  
Reactive gases removed during furnace analysis by reaction with 2 SAES GP-50 getters, 1 operated at ~450°C and 1 at 20°C. Gas also exposed to a W filament operated at ~2000°C.

**Analytical parameters:**

Electron multiplier sensitivity averaged  $4.7 \times 10^{-17}$  moles/pA for the furnace extraction system.  
Total system blank and background for the furnace averaged  $224, 3.7, 1.5, 2.9, 6.3 \times 10^{-18}$  moles.  
J-factors determined to a precision of  $\pm 0.1\%$  by CO<sub>2</sub> laser-fusion of 6 single crystals from each of 6 radial positions around the irradiation tray.  
Correction factors for interfering nuclear reactions were determined using K-glass and CaF<sub>2</sub> and are as follows:

$$(^{39}\text{Ar}/^{37}\text{Ar})_{\text{Ca}} = 0.000676 \pm 4\text{e-}06$$

$$(^{36}\text{Ar}/^{37}\text{Ar})_{\text{Ca}} = 0.000277 \pm 2\text{e-}06$$

$$(^{38}\text{Ar}/^{39}\text{Ar})_{\text{K}} = 0.0126$$

$$(^{40}\text{Ar}/^{39}\text{Ar})_{\text{K}} = 0 \pm 0.0004$$

---

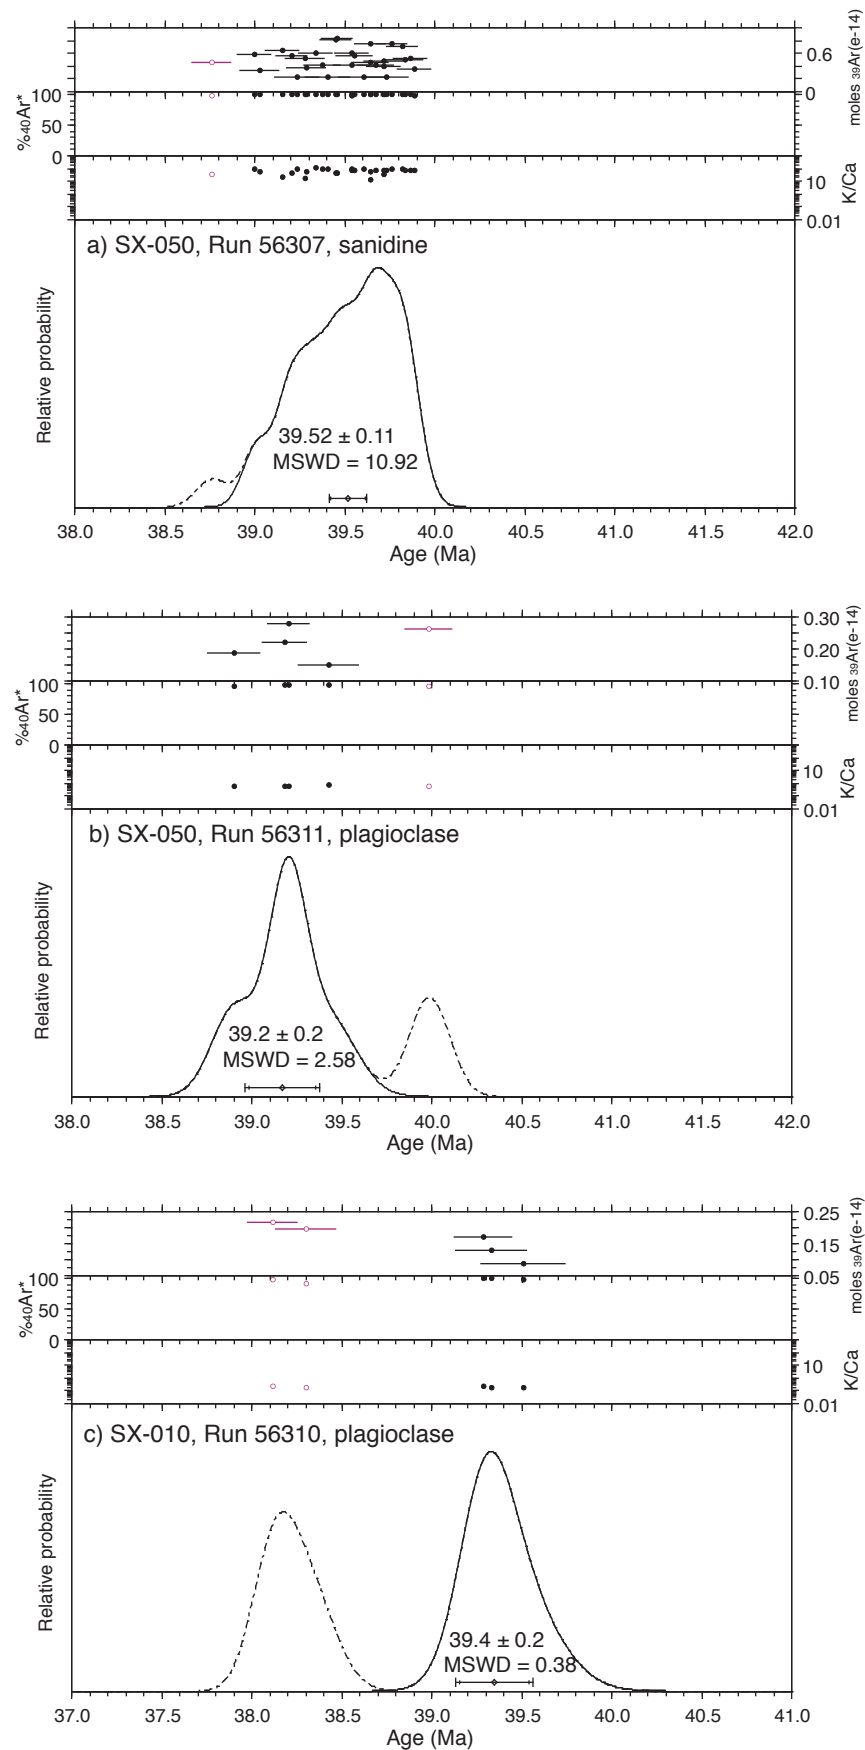

Appendix Figure 1. Probability distribution plots (Deino and Potts, 1992) for  $^{40}\text{Ar}/^{39}\text{Ar}$  laser-fusion analyses of El Bosque Petrificado Piedra Chamana samples. a) sanidine from welded ignimbrite, b) plagioclase from welded ignimbrite, c) plagioclase from white ash above paleosol.

## **References for Data Repository**

- Deino, A. and Potts, R., 1992. Age-probability spectra for examination of single-crystal  $^{40}\text{Ar}/^{39}\text{Ar}$  dating results: examples from Olorgesailie, Southern Kenya Rift. *Quaternary International*, v. 13/14, 47-53
- Renne, P. R., C. C. Swisher, A. L. Deino, D. B. Karner, T. L. Owens, and D. J. Depaolo, 1998a, Intercalibration Of Standards: Absolute Ages and Uncertainties In  $^{40}\text{Ar}/^{39}\text{Ar}$  Dating: *Chemical Geology*, v. 145, p. 117-152.
- Steiger, R.H., and Jaeger, E., 1977. Subcommittee on geochronology: Convention on the use of decay constants in geo- and cosmochemistry. *Earth and Planet. Sci. Lett.*, 36, 359-362.
- Taylor, J.R., 1982. *An Introduction to Error Analysis: The Study of Uncertainties in Physical Measurements*, Univ. Sci. Books, Mill Valley, Calif., 270 p.
